# Supplementary material
Source: PubMed Central journal article supplement (PMC8964063)
Supplement: NIHMS1772880-supplement-Supp_Materials___Figures.pdf [file NIHMS1772880-supplement-Supp_Materials___Figures.pdf]

# 1 **Supplementary Information**

## **Cas11 enables genome engineering in human cells with compact CRISPRCas3 systems**

2 Renke Tan\*, Ryan K Krueger\*, Max J Gramelspacher, Xufei Zhou, Yibei Xiao, Ailong Ke,  
3 Zhonggang Hou<sup>#</sup> and Yan Zhang<sup>#</sup>

4 **Supplemental Figures**

Fig. S1

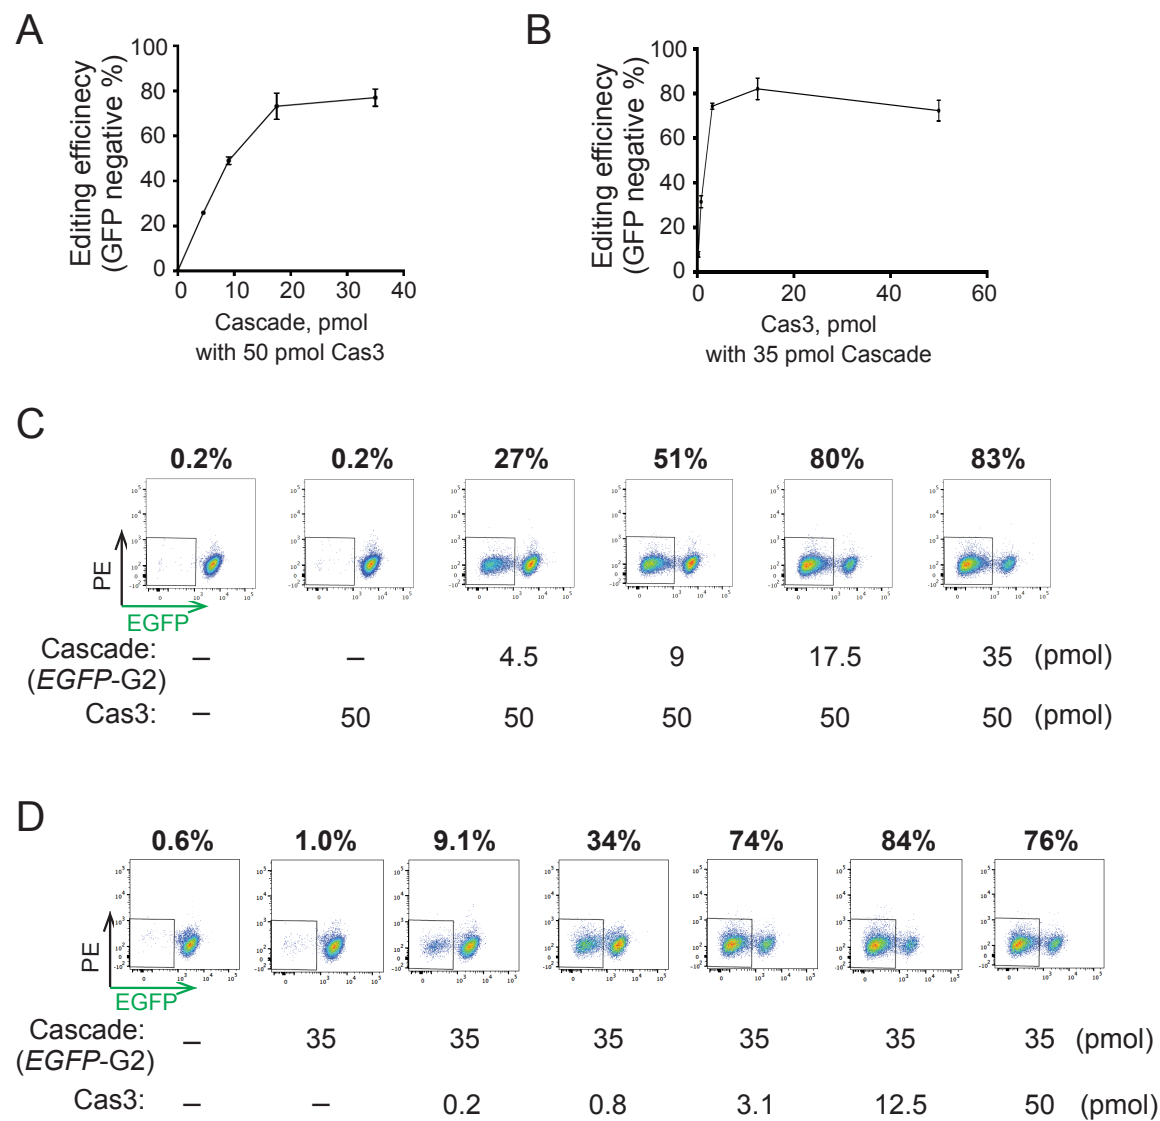

5

6 **Figure S1. Cascade RNP and Cas3 protein titrations in human cell gene editing. Related**  
7 **to Figure 2. (A)** RNP editing experiments in HAP1 cells with 50 pmol NlaCas3 and increasing  
8 amount of *EGFP*-targeting NlaCascade. Cascade amount electroporated was titrated from 4.5  
9 to 35 pmol. **(B)** RNP editing in HAP1 cells with 35 pmol *EGFP*-targeting NlaCascade and  
10 increasing amount of Cas3. NlaCas3 electroporated was 0, 0.2, 0.8, 3.1, 12.5, and 50 pmol. The  
11 editing efficiencies in (A) and (B) were measured and shown as in Figure 4B. **(C) (D)**  
12 Representative flow cytometry plots from experiments in (A) and (B), with percentages of  
13 *EGFP*- cells in total population shown on the top.

Fig. S2

A

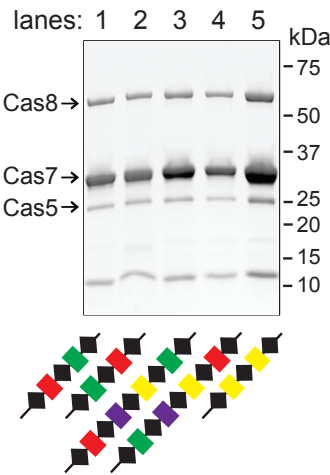

B

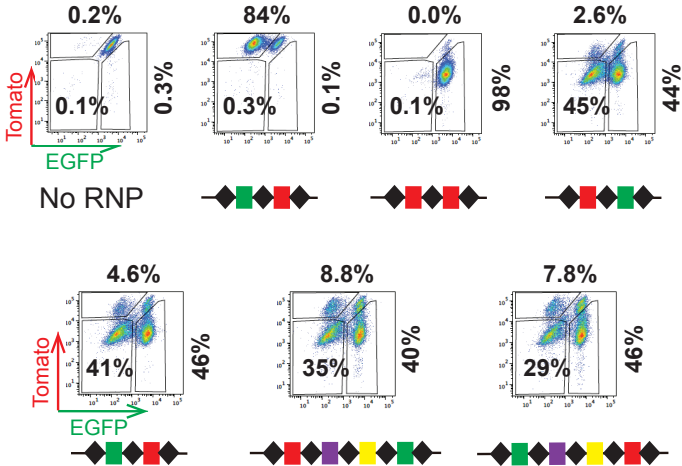

C

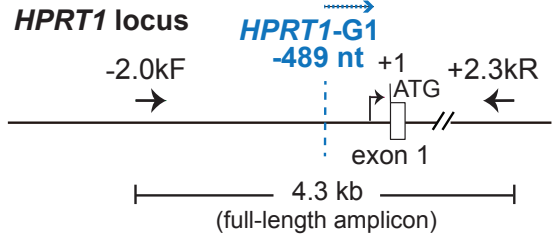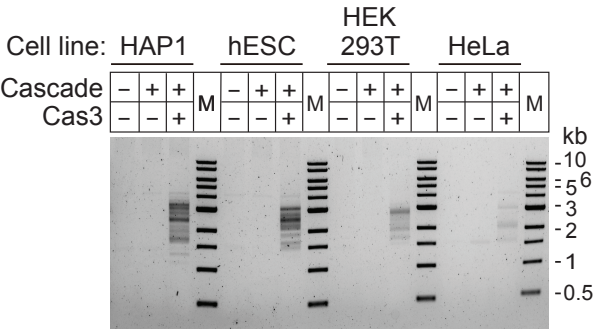

D

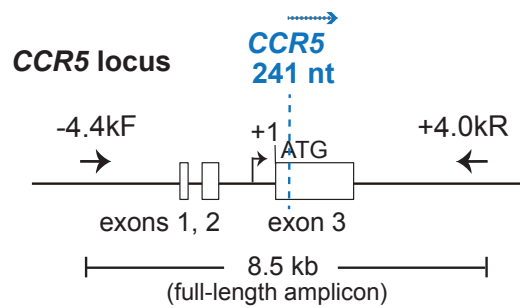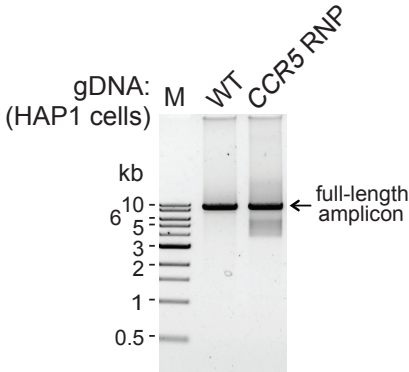

**Figure S2. NlaCascade-Cas3 RNP enables gene targeting in multiple human cell lines, at the *HPRT1* or *CCR5* loci. Related to Figure 2. (A)** SDS-PAGE of purified NlaCascade samples used for multiplexed editing in Figure 2E and for *CCR5* targeting in Figure S2A. The spacer coloring scheme is as in Figure 2E. **(B)** Representative flow cytometry plots from an experiment in Figure 2E, with percentages of EGFP-/tdTm+, EGPF+/ tdTm- or EGFP-/tdTm- cells shown on the top, to the right or at the bottom, respectively. **(C)** Left, schematic of the *HPRT1* locus. Big black arrows indicate annealing sites for two primers used in genomic PCR. All positions indicated are relative to *HPRT1* translation start site (+1). Blue dashed line, the recognition site (3<sup>rd</sup> nt of TTC PAM) for guide *HPRT1*-G1. The blue arrow indicates the inferred direction of NlaCas3 translocation. Right, long-range PCR using genomic DNA extracted from various human cell types (HAP1, hESCs, HEK293T, and Hela) edited with Cas3 and Cascade-*HPRT1*. Smaller-than-full-length amplicons indicate large genomic deletions. M, size markers. **(D)** Left, schematic of the *CCR5* locus. Big black arrows indicate annealing sites for two primers for genomic PCR. All positions indicated are relative to *CCR5* translation start site (+1). Blue dashed line, recognition site (3<sup>rd</sup> nt of TTC PAM) for guide *CCR5*-G2. The blue arrow indicates the inferred direction of NlaCas3 translocation. Right, long-range PCR as described in (A), using genomic DNA extracted from HAP1 cells edited with Cas3 and Cascade-*CCR5*. Smaller-than-full-length amplicons indicate large genomic deletions resulted from *CCR5* targeting.

Fig. S3

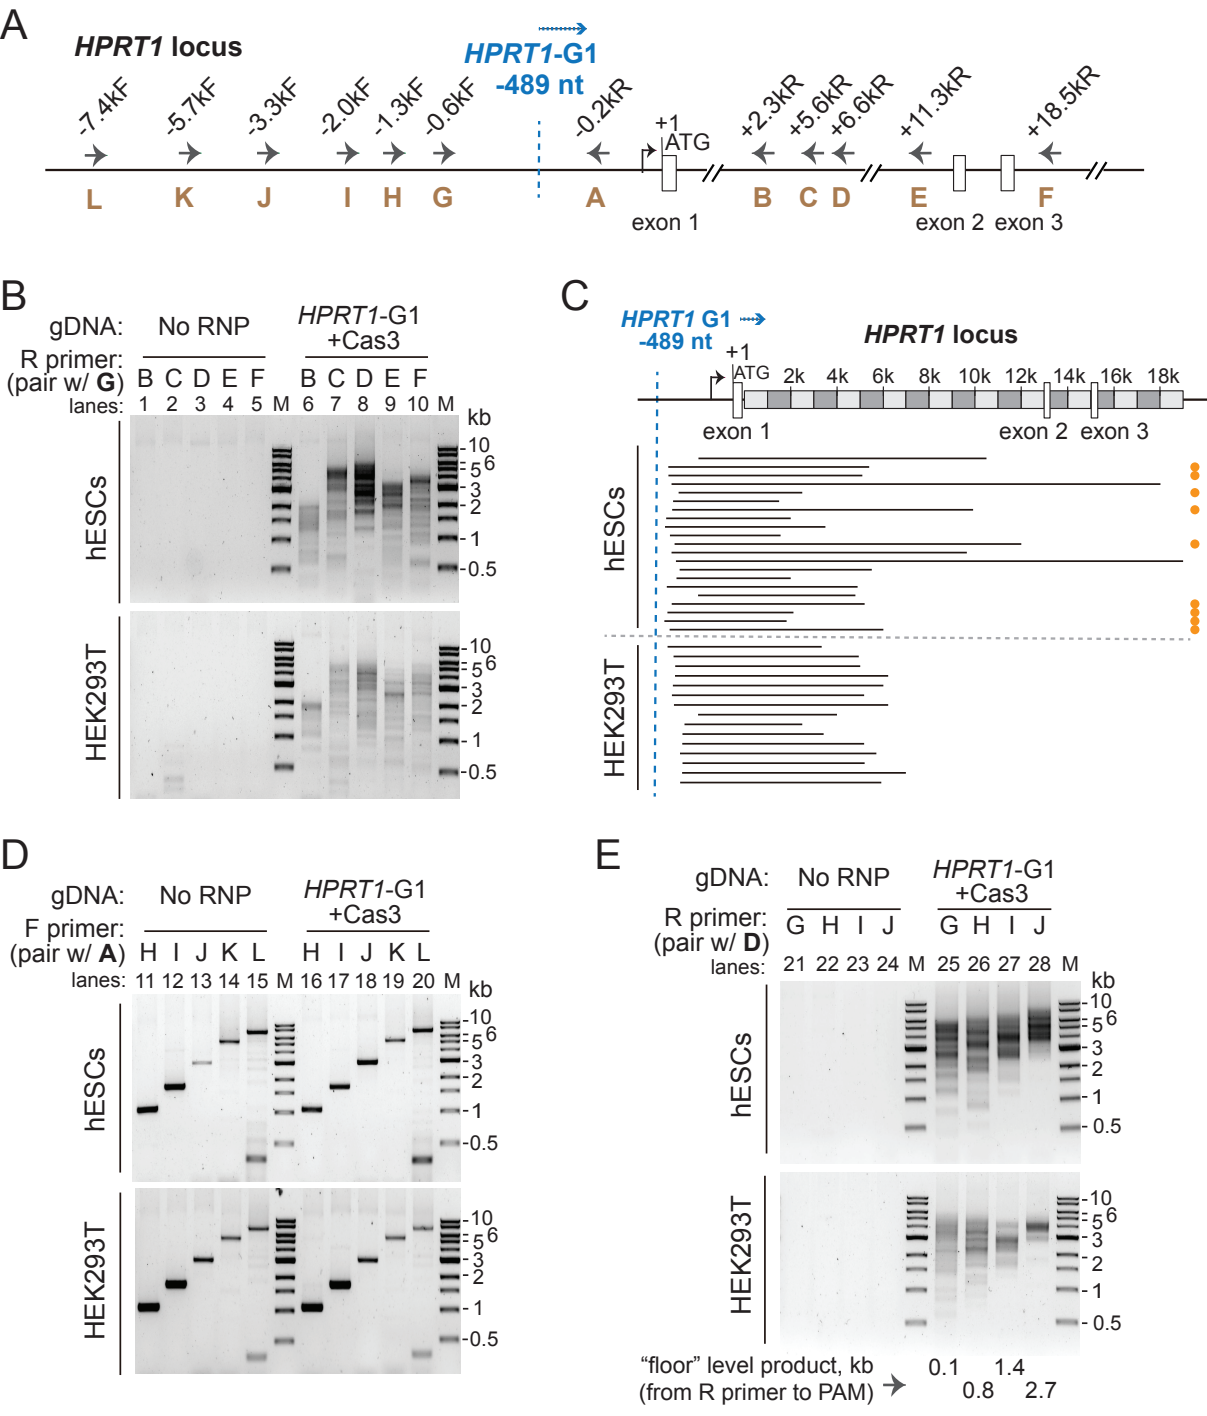

34 **Figure S3. NlaCRISPR-Cas3 creates targeted, large uni-directional genomic deletions in**  
35 **hESC and HEK293T cells. Related to Figure 3. (A)** Schematic of *HPRT1* locus and annealing  
36 sites of PCR primers used in (B), (D) and (E). All positions are relative to *HPRT1* translation  
37 start site (+1). Blue dashed line, recognition site (3<sup>rd</sup> nt of TTC PAM) for guide *HPRT1*-G1. The  
38 blue arrow indicates the inferred direction of NlaCas3 translocation. **(B)(D)(E)** Genomic lesion  
39 analysis via long-range PCR, using primers amplifying regions downstream (B) and upstream  
40 (D) of the CRISPR-targeted *HPRT1* site, or regions spanning both directions (E). Genomic DNA  
41 samples used as PCR template were extracted from hESCs and HEK293T cells. Large, uni-  
42 directional deletions were detected in PAM-proximal genomic region, from cells treated with  
43 Cas3 and Cascade *HPRT1*-G1, but not the untreated control. Smaller-than-full-length amplicons  
44 indicate large deletions. The lack of full-length product from the un-edited control is likely due to  
45 a GC-rich region in exon 1 (~ 400 bp downstream of target site) that prevents amplification.  
46 Smaller-than-full-length amplicons indicate large deletions. M, size markers. **(C)** *HPRT1* deletion  
47 locations, revealed by TOPO cloning of pooled tiling PCRs from lanes 6-10 in (B) and Sanger  
48 sequencing of randomly selected individual clones. The black lines denote deleted genomic  
49 regions. Orange, green and the lack of dots on the right indicate Groups II, IV and I deletion  
50 junctions as in Dolan *et al.*, 2019.

**A** *DNMT3B-EGFP*  
in hESCs

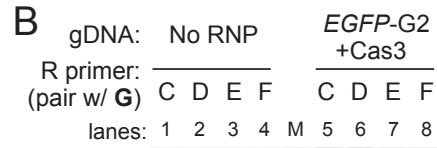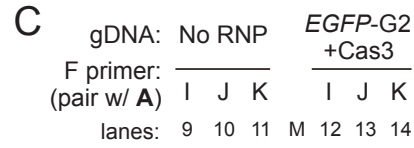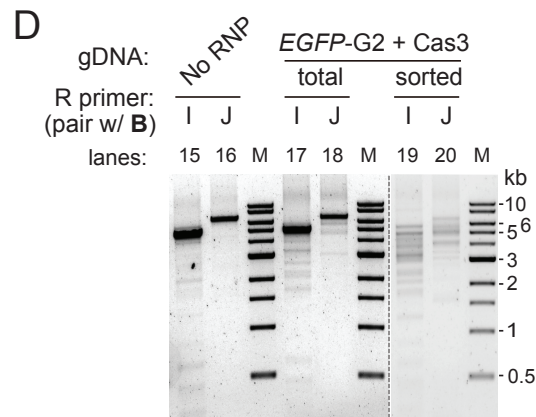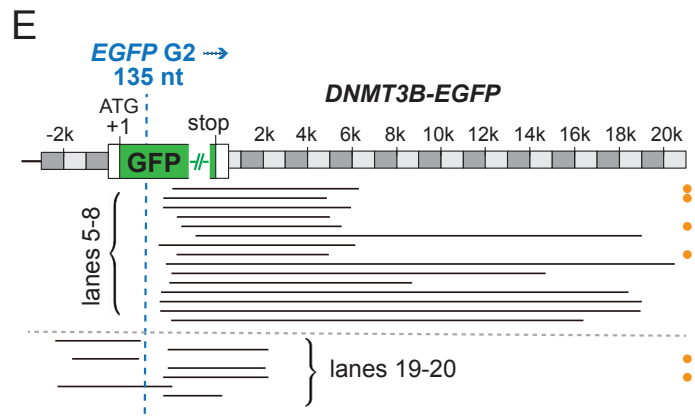

**Figure S4. NlaCRISPR-Cas3 induces large deletions at the *DNMT3b* locus in hESCs.**

**Related to Figure 3. (A)** Schematic of the *DNMT3b-EGFP* locus in hESC reporter cells, with annealing sites of PCR primers used in (B)-(E) indicated. All positions are relative to *EGFP* translation start site (+1). Blue dashed line, recognition site (3<sup>rd</sup> nt of TTC PAM) for guide *EGFP-G2*. The blue arrow indicates the inferred direction of NlaCas3 translocation. **(B)** Genomic lesion analysis via long-range PCR, using primers amplifying regions downstream (B) or upstream (C) of CRISPR-targeted *EGFP* site, or regions spanning both directions (D). Genomic DNA used as PCR template was extracted from hESC reporter cells bearing *EGFP* and *tdTm* at the endogenous *DNMT3b* locus. Large, uni-directional deletions were detected in the PAM-proximal region, from cells edited with Cas3 and Cascade *EGFP-G2*, but not the “no RNP” control cells. Smaller-than-full-length products indicate large deletions. M, size markers. Discontinuous lanes from the same gel are separated by dashed grey line. **(E)** Deletion locations revealed by TOPO cloning of pooled tiling PCRs from lanes 5-8 from (B) and 19-20 from (D). Randomly selected clones are Sanger sequenced. The black lines indicate deleted genomic regions. Orange dots and lack thereof on the right indicate Groups II and I deletion junctions as in Dolan *et al.*, 2019. Note the existence of three bi-directional deletion events from PCR of lanes 19-20.

Fig. S5

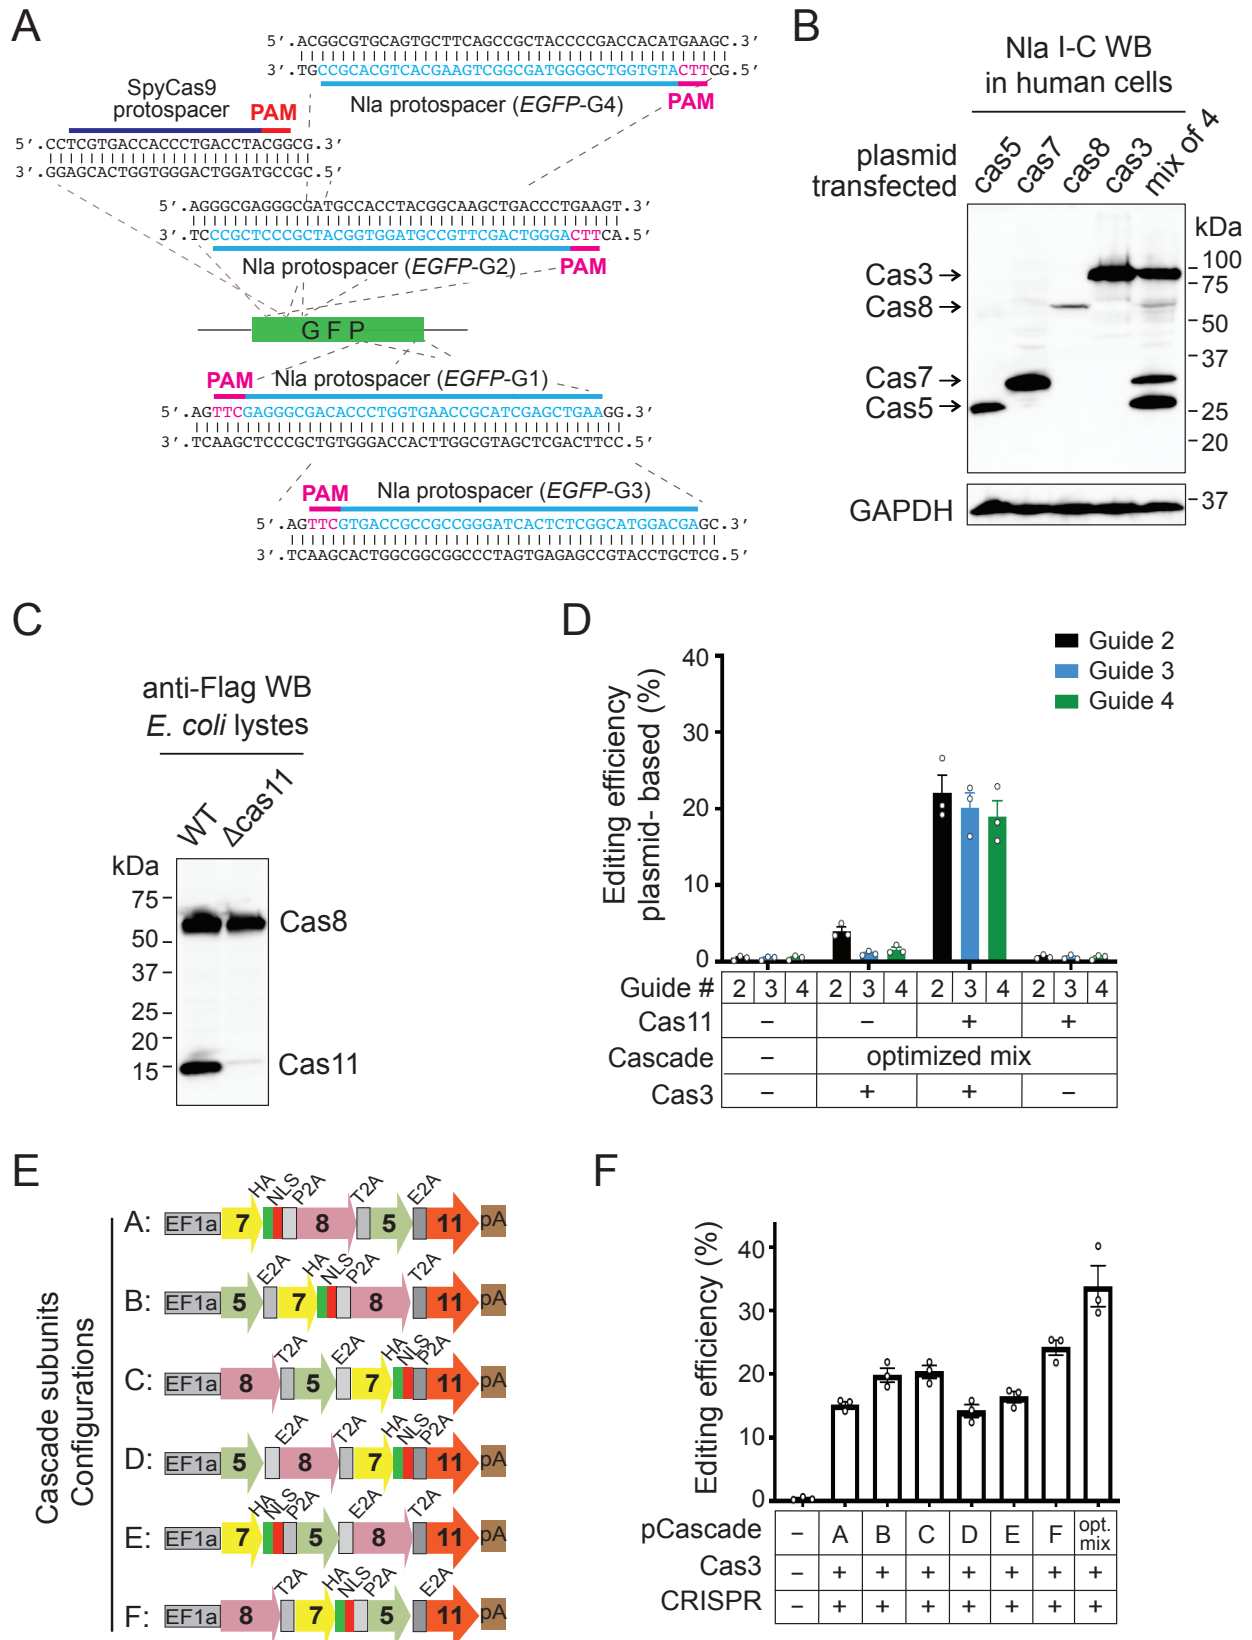

**Figure S5. NlaCas11 is the missing component for efficient plasmid-based editing in human cells. Related to Figures 4-5.** (A) Schematics of EGFP reporter and target sites for all NlaCascades and SpyCas9. Protospacers are indicated in blue and corresponding PAMs in magenta. (B) Anti-HA western blot detecting expression of all canonical *cas* genes of Nla I-C system (*cas5*, *cas7*, *cas8* and *cas3*) after plasmid transfection into HAP1 cells. Bottom, GAPDH is probed as loading control. Molecular weight markers (kDa) are indicated. (C) Nla I-C CRISPR system indeed expresses a previously overlooked Cas11 from within *cas8*. Plasmids expressing CRISPR and the *cascade* operon were co-transformed into *E. coli* BL21(DE3), and the resulting strains subject to Western Blot. pCascade plasmids have a Flag-tag at the C-terminus of *cas8*. Both Cas8 and Cas11 proteins were detectable by anti-Flag western from wt strain; whereas Cas11 production was abolished by mutations disrupting the RBS and internal translation start site. Molecular weight markers (kDa) are indicated. (D) The Nla *crispr-cas* plasmids depicted in Figure 5A were transfected into HAP1 cells to evaluate editing efficiencies for *EGFP*-targeting guides 2, 3, and 4. The results were plotted as the percentage of EGFP- cells in the total population. Data are shown as mean  $\pm$  SEM, n=3. (E) Schematics of the polycistronic constructs tested in (F). The NLS, HA tag and regulatory elements are as described in Figure 4A. (F) Each plasmid depicted in (E) was transfected into HAP1 cells along with the Cas3- and CRISPR-encoding plasmids, and the gene editing efficiencies were assessed and shown as in Figure 4B. Data are shown as mean  $\pm$  SEM, n=3.

**A**

5'-AGGGCGAGGGCGATGCCACCTACGGCAAGCTGACCCTGAAGT-3'

3'-TCCCGCTCCCGCTACGGTGGATGCCGCTCGACTCGGCACTTCA-5'

protospacer (EGFP-G2[Dvu-I-C]) PAM

**Dvu I-C Western Blot**

plasmid transfected cas5 cas7 cas8 cas3

Cas3 → Cas8 →

Cas7 → Cas5 →

GAPDH → 37

**B**

5'-GAGTCTGGTACCGCCCGCGGATCACTCTCGGCATGGACAG-3'

3'-CTCAAGCACTGGCGGGCGGCCTAGTGAGAGCCGTACCTGCTC-5'

protospacer (Syn-ID) PAM

**Syn I-D Western Blot**

plasmid transfected cas5 cas6 cas7 cas11 cas3 cas10

Cas10 → Cas3 →

Cas7 → Cas6, Cas5 →

Cas11 →

GAPDH → 37

**C**

5'-GCATGGCACCGCGCAGCACCAGCGGACGCTCCGGCACC-3'

3'-CGTACCGTGGCCGCTGCTGGCCGTCGCCGTCGAGGCCGTGGCG-5'

protospacer (Syn-IB) PAM

**Syn I-B Western Blot**

plasmid transfected cas3 cas5 cas6 cas7 cmx8

Cas3 → Cmx8 →

Cas7 → Cas5, Cas6 →

GAPDH → 37

**D**

WT CRISPR (R-S-R-S-R)

Nla I-C:

Syn I-B:

Syn I-D:

**E**

CRISPR

Nla I-C

Syn I-B

Syn I-D

**Cascade-Cas3-target-PAM (protospacer)**

Nla I-C

Syn I-B

Syn I-D

**Editing efficiency (%)**

Repeat

Syn I-D Syn I-B Nla I-C

Editing efficiency (%)

set #1

set #2

set #3

**F**

Cascade-Cas3-target-PAM

Repeat

Nla I-C Syn I-B Syn I-D

Nla I-C

Syn I-B

Syn I-D

0 5 10 15 20

**Figure S6. Target sequence, protein expression and repeat specificity for orthogonal Dvu I-C, Syn I-D, and Syn I-B CRISPR systems. Related to Figures 6. (A-C)** Top: Schematics of target sites used, with protospacers for Cascade RNPs in blue and corresponding PAMs in magenta. Bottom: anti-HA western blot detecting expression of all *cas* genes of the Dvu I-C (A), Syn I-D (B), and Syn I-B (C) systems, after transfection into HAP1 cells. GAPDH was probed as loading control. Molecular weight markers (kDa) are indicated. Bha I-C is not included because there are no epitope tags on its *cas* plasmids. **(D)** Schematics of wt CRISPR constructs for Nla I-C, Syn I-D, and Syn I-B editors. Light grey, dark grey, and black diamonds indicate CRISPR repeats of the I-C, I-B and I-D systems, respectively. Light green (*EGFP*-targeting), red (*tdTm*-targeting), and dark green (*EGFP*-targeting) rectangles indicate CRISPR spacers for the I-C, I-B, and I-D editors. **(E)** Repeat specificity suffices for CRISPR-Cas3 orthogonality in human cells. Mix-and-match experiment assaying Cas plasmids from three distinct type I systems paired with wt or chimeric CRISPR constructs. The actual repeat and spacer analyzed in each test were indicated, with schematics of the entire CRISPR array included on the left; the three wt CRISPRs without repeat swap were boxed. Genome editing was evaluated in HAP1 cells following plasmid transfection, and the efficiencies were plotted as in Figure 4B. Data are shown as mean  $\pm$  SEM, n=3. **(F)** Heatmaps of gene editing efficiencies reported in (E).
